# Supplementary material for: Novel nitro-substituted formazan derivatives: selective ratiometric and colorimetric chemosensors for fluoride anion sensing detectable by the naked eye
Source: Royal Society of Chemistry journal article supplement (doi:10.1039/d0nj01860k), 2020-01-01
Supplement: d0nj01860k1.pdf [file d0nj01860k1.pdf]

## Electronic Supplementary Information (ESI)

### Novel nitro-substituted formazan derivatives: Selective ratiometric and colorimetric chemosensors for fluoride anion sensing detectable by the naked eye

Gulsen Turkoglu\*

*Anadolu University, Faculty of Science, Chemistry Department, 26470 Eskisehir, Turkey.*

\*Correspondence: [gulsen.turkoglu@gidatarim.edu.tr](mailto:gulsen.turkoglu@gidatarim.edu.tr)

| <u>Contents</u>                                                                                                                                                                                                          | <u>Page</u> |
|--------------------------------------------------------------------------------------------------------------------------------------------------------------------------------------------------------------------------|-------------|
| <b>Figure S1.</b> Ratiometric plots of <b>FNB</b> (a) and <b>FDNB</b> (b) with addition fluoride anion                                                                                                                   | 2           |
| <b>Figure S2.</b> The titration curves of sensor <b>FNB</b> with $F^-$ anion showing the 1:1 stoichiometry by UV-visible experiments.                                                                                    | 2           |
| <b>Figure S3.</b> The titration curves of sensor <b>FDNB</b> with $F^-$ anion showing the 1:1 stoichiometry by UV-visible experiments.                                                                                   | 3           |
| <b>Figure S4.</b> The absorbance change addition at 648 nm of the sensor <b>FNB</b> (17 $\mu$ M) as a function of fluoride concentration in THF. Fluoride concentration : 0.014–0.026 mM (the lower concentration part). | 3           |
| <b>Figure S5.</b> The absorbance change addition at 485 nm of the sensor <b>FDNB</b> (13 $\mu$ M) as a function of fluoride concentration in THF. Fluoride concentration: 0.16–0.24 mM (the lower concentration part).   | 4           |
| <b>Figure S6.</b> $^1H$ NMR (500 MHz, $CDCl_3$ ) spectrum of compound <b>FNB</b> .                                                                                                                                       | 5           |
| <b>Figure S7.</b> $^{13}C$ NMR (126 MHz, $CDCl_3$ ) spectrum of compound <b>FNB</b> .                                                                                                                                    | 5           |
| <b>Figure S8.</b> $^1H$ NMR (500 MHz, $DMSO-d_6$ ) spectrum of compound <b>FDNB</b> .                                                                                                                                    | 6           |
| <b>Figure S9.</b> $^{13}C$ NMR (126 MHz, $DMSO-d_6$ ) spectrum of compound <b>FDNB</b> .                                                                                                                                 | 6           |

## UV-vis spectra

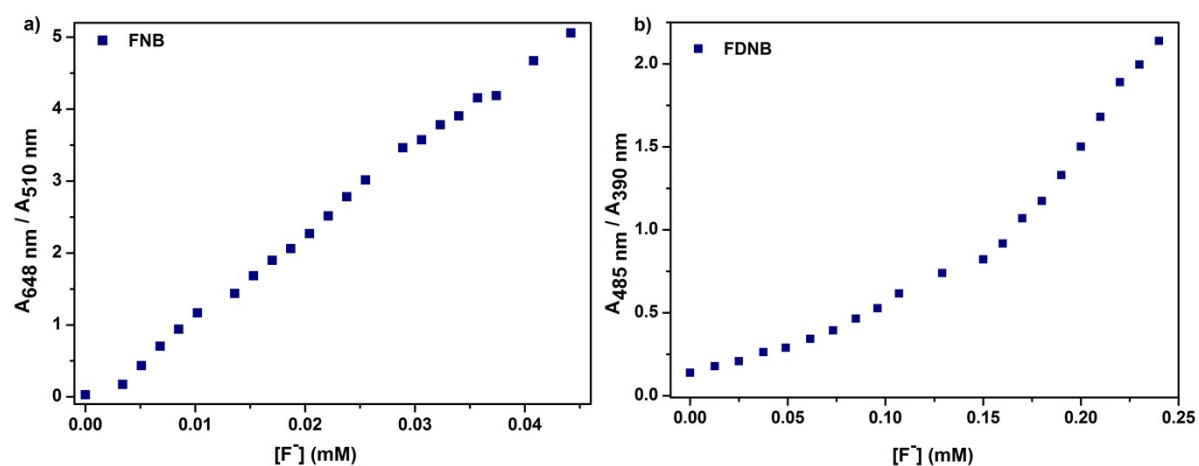

**Figure S1.** Ratiometric plots of **FNB** (a) and **FDNB** (b) with addition fluoride anion.

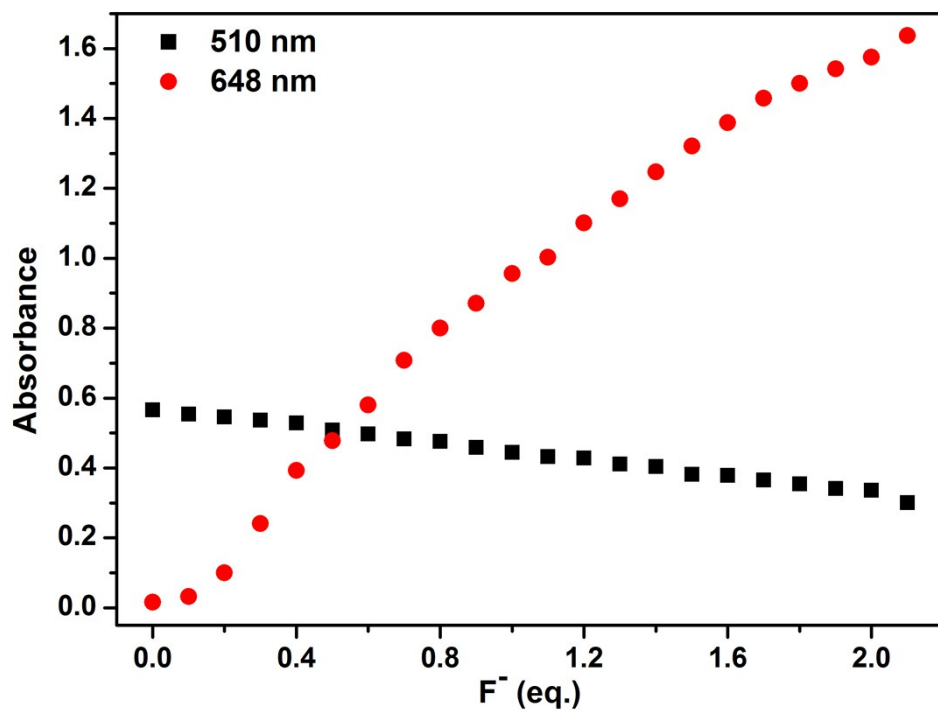

**Figure S2.** The titration curves of sensor **FNB** with  $F^-$  anion showing the 1:1 stoichiometry by UV-visible experiments.

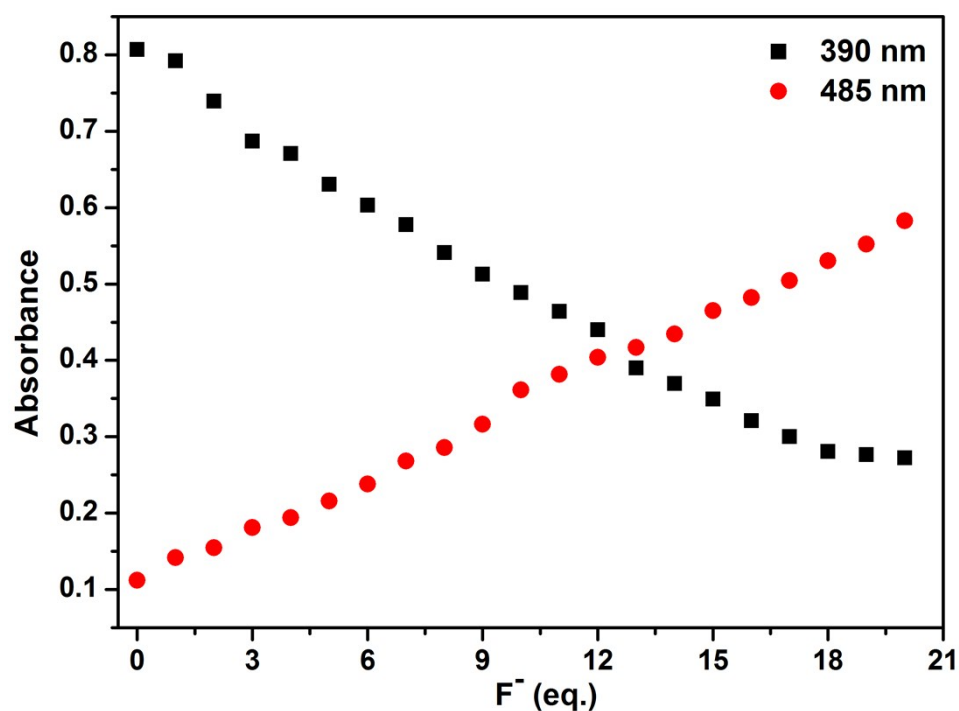

**Figure S3.** The titration curves of sensor **FDNB** with  $F^-$  anion showing the 1:1 stoichiometry by UV-visible experiments.

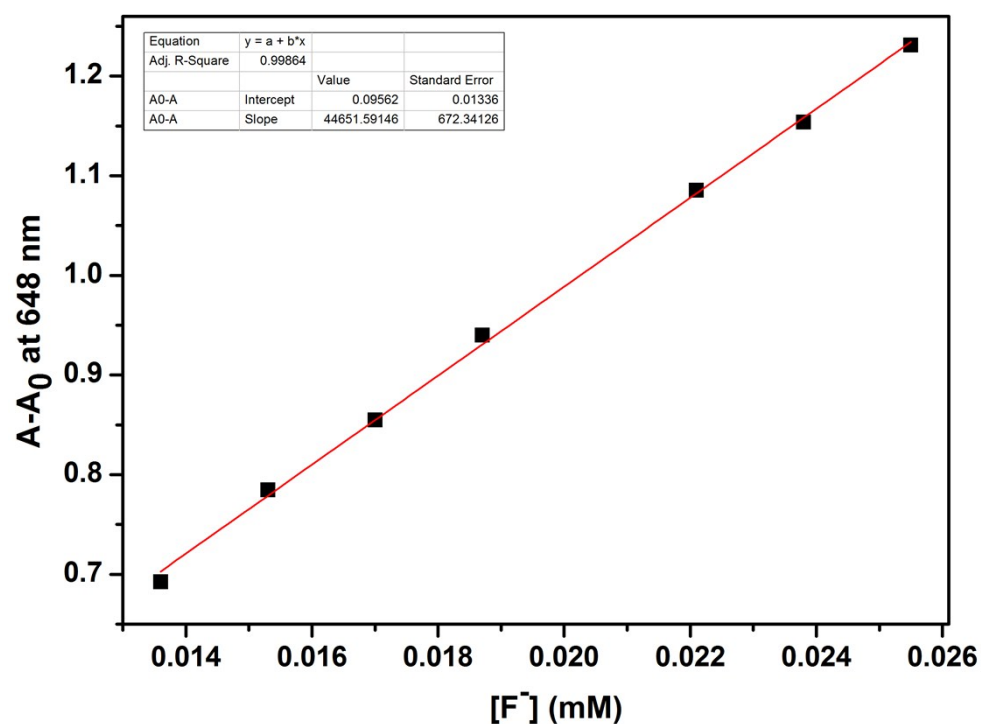

**Figure S4.** The absorbance change addition at 648 nm of the sensor **FNB** (17  $\mu$ M) as a function of fluoride concentration in THF. Fluoride concentration: 0.014–0.026 mM (the lower concentration part).

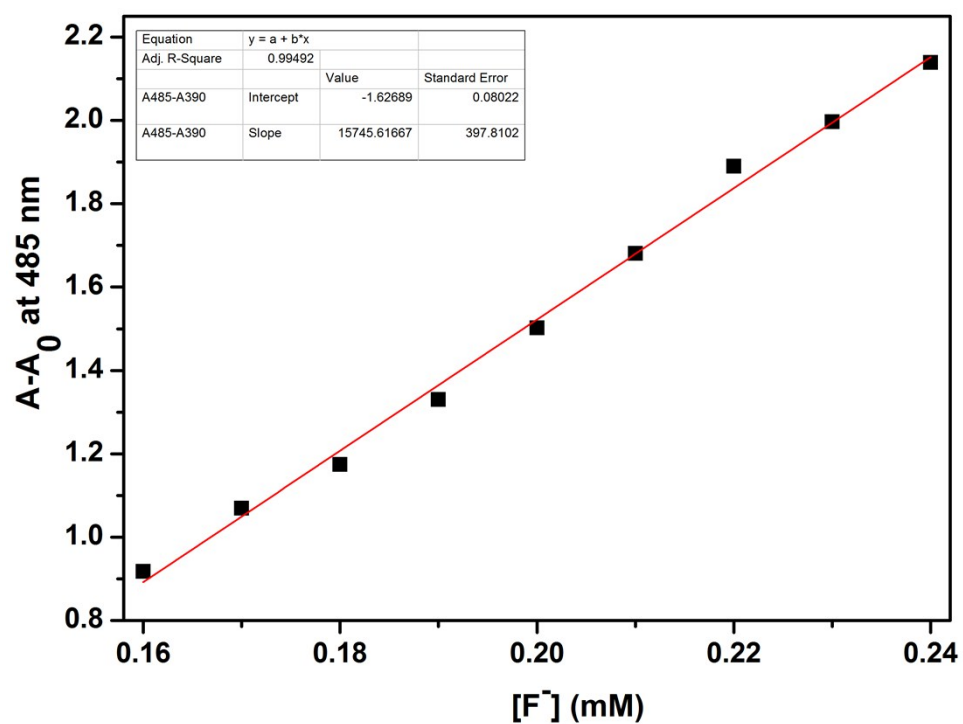

**Figure S5.** The absorbance change addition at 485 nm of the sensor **FDNB** (13  $\mu\text{M}$ ) as a function of fluoride concentration in THF. Fluoride concentration: 0.16–0.24 mM (the lower concentration part).

## NMR spectra

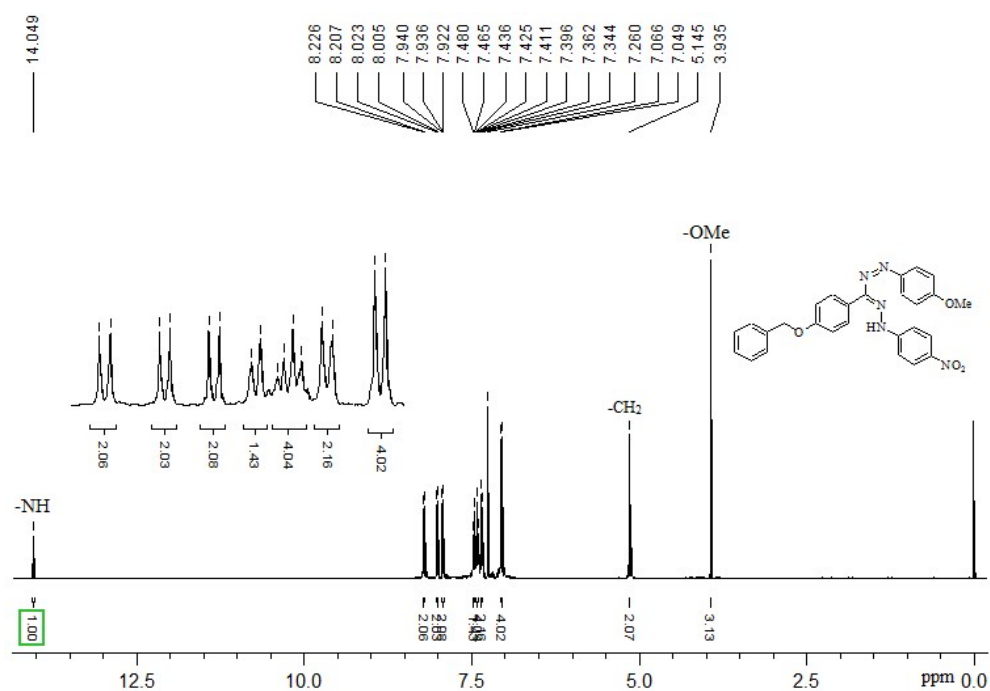

**Figure S6.** <sup>1</sup>H NMR (500 MHz, CDCl<sub>3</sub>) spectrum of compound **FNB**.

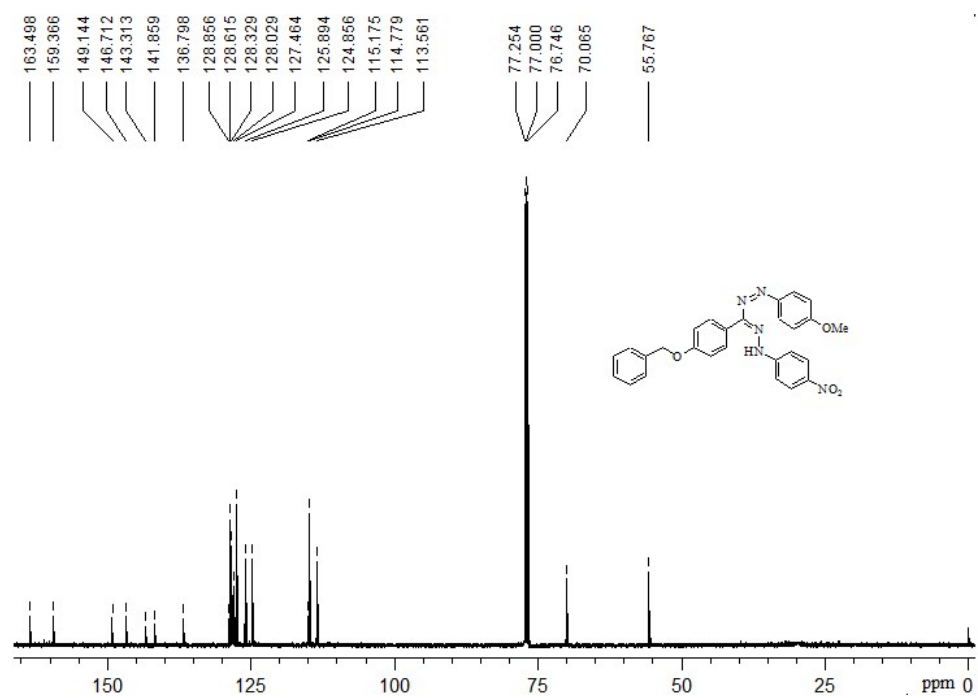

**Figure S7.** <sup>13</sup>C NMR (126 MHz, CDCl<sub>3</sub>) spectrum of compound **FNB**.

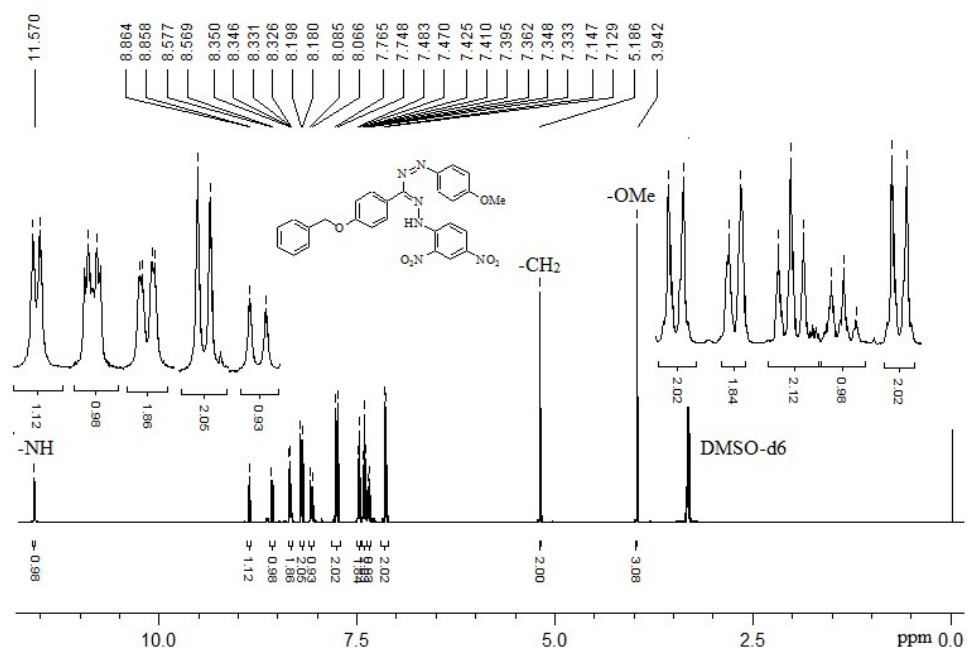

**Figure S8.** <sup>1</sup>H NMR (500 MHz, DMSO-*d*<sub>6</sub>) spectrum of compound **FDNB**.

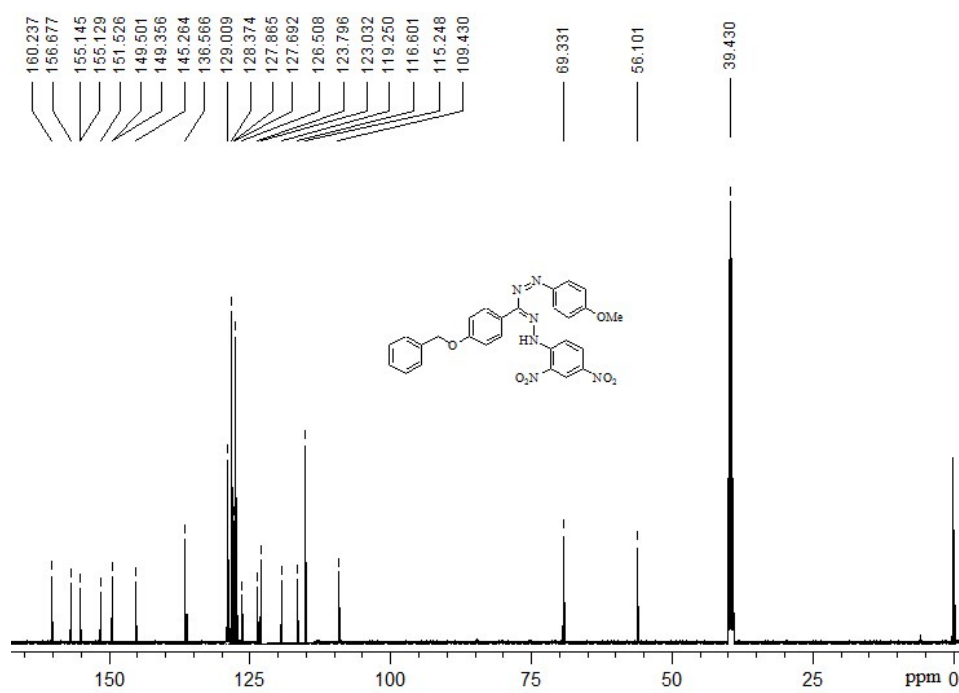

**Figure S9.** <sup>13</sup>C NMR (126 MHz, DMSO-*d*<sub>6</sub>) spectrum of compound **FDNB**.
